# Supplementary material for: Facile synthesis of highly conductive MoS2/graphene nanohybrids with hetero-structures as excellent microwave absorbers
Source: Royal Society of Chemistry journal article supplement (doi:10.1039/c8ra08086k), 2018-01-01
Supplement: c8ra08086k1.pdf [file c8ra08086k1.pdf]

## Supporting Information

### **Facile synthesis of highly conductive MoS<sub>2</sub>/graphene nanohybrids with hetero-structures as excellent microwave absorber**

Jixing Chai,<sup>†a,b</sup> Deqing Zhang,<sup>†\*a,b</sup> Junye Cheng,<sup>c,d</sup> Yixuan Jia,<sup>b</sup> Xuewei Ba,<sup>b</sup> Ya Gao,<sup>e</sup> Lei Zhu,<sup>f</sup> Hao Wang<sup>\*c</sup> and Maosheng Cao<sup>\*g</sup>

*<sup>a</sup> Heilongjiang Provincial Key Laboratory of Polymeric Composite Materials, Qiqihar University, Qiqihar 161006, China*

*<sup>b</sup> School of Materials Science and Engineering, Qiqihar University, Qiqihar 161006, China*

*<sup>c</sup> Guangdong Provincial Key Laboratory of Micro/Nano Optomechatronics Engineering, College of Mechatronics and Control Engineering, Shenzhen University, Shenzhen 518060, China.*

*<sup>d</sup> Center of Super-Diamond and Advanced Films, and Department of Materials Science and Engineering, City University of HongKong, HongKong 999077, China*

*<sup>e</sup> School of Chemistry and Chemical Engineering, Qiqihar University, Qiqihar 161006, China*

*<sup>f</sup> School of Communication and Electronic Engineering, Qiqihar University, Qiqihar 161006, China*

*<sup>g</sup> School of Materials Science and Engineering, Beijing Institute of Technology, Beijing 100081, China.*

\*Corresponding author: caomaosheng@bit.edu.cn (M.S. Cao), zhdqing@163.com (D.Q. Zhang), whao@szu.edu.cn (H. Wang).

<sup>†</sup> These authors contributed equally to this work.

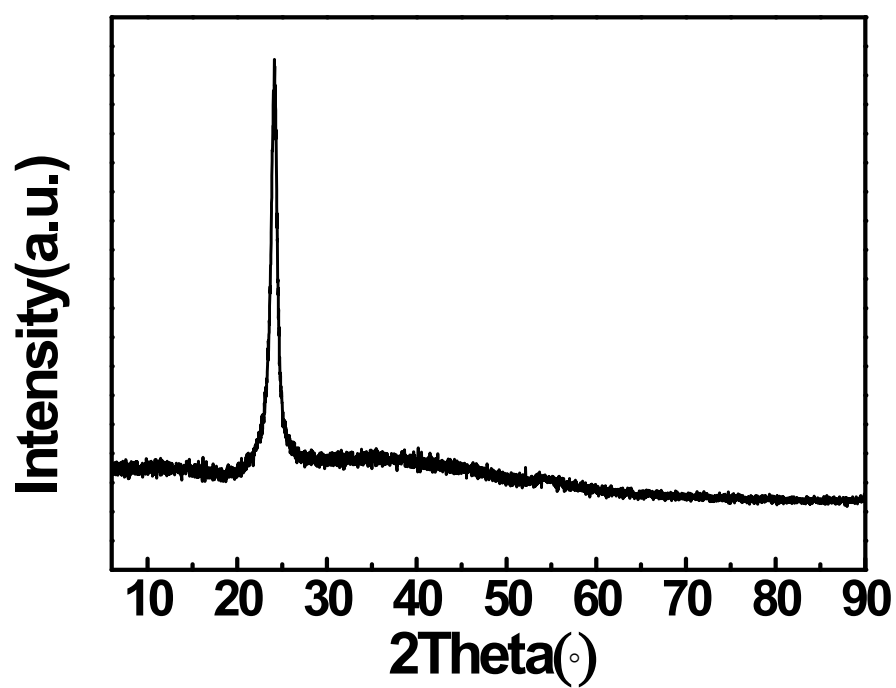

Fig. S1 X-ray powder diffraction (XRD) patterns for graphene.

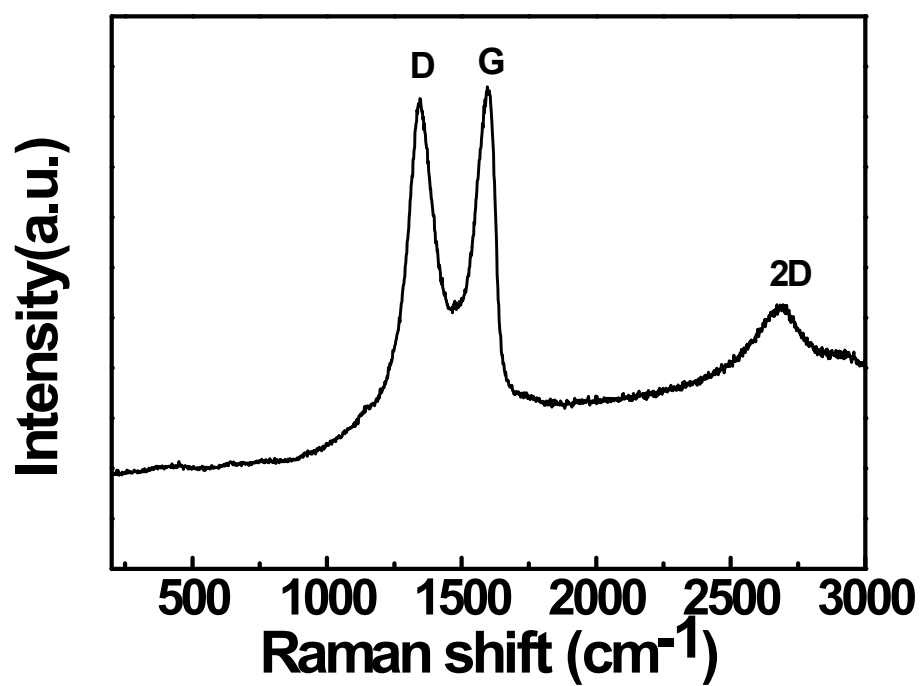

**Fig. S2** Raman spectrum for GN.
